# Supplementary material for: A single‐cell RNA labeling strategy for measuring stress response upon tissue dissociation
Source: PubMed Central journal article supplement (PMC9912023; doi:10.15252/msb.202211147), 2022-12-27
Supplement: MSB-19-e11147-s001.pdf [file MSB-19-e11147-s001.pdf]

## Expanded View Figures

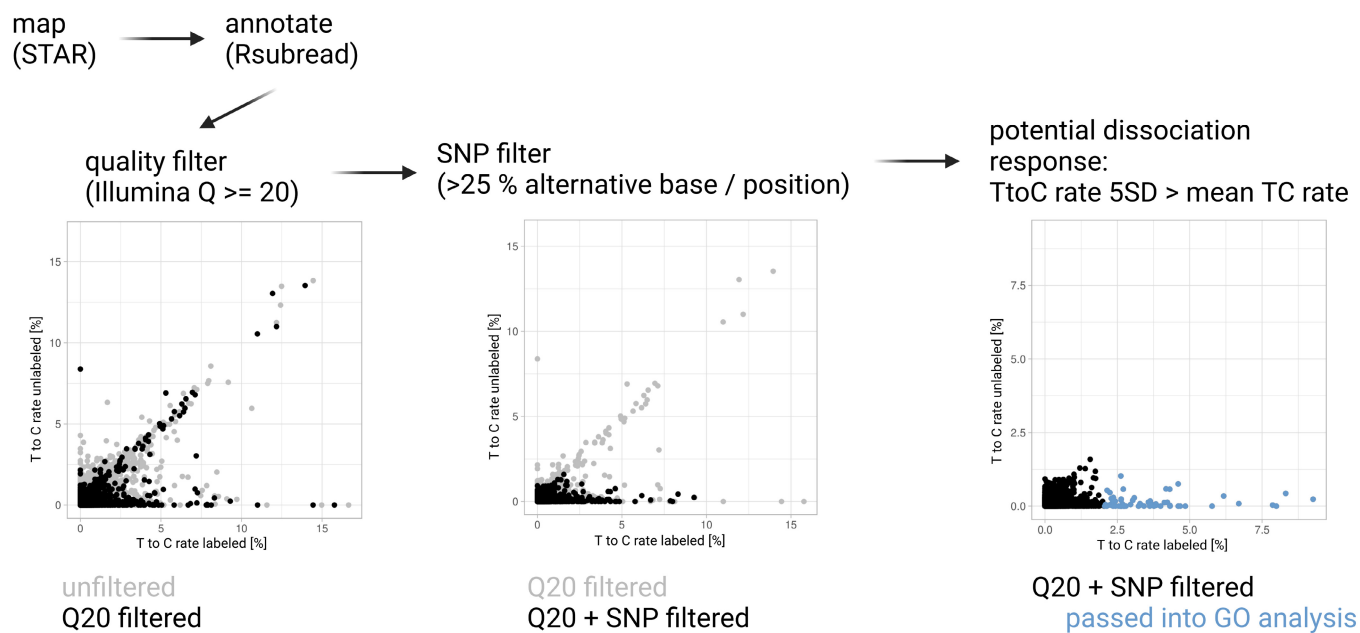

**Figure EV1. Computational workflow for bulk data.**

Reads are mapped using STAR, annotated using Rsubread and passed through quality and SNP filtering steps before selecting genes for GO analysis based on a T-to-C conversion rate at least 5 standard deviations larger than the mean.

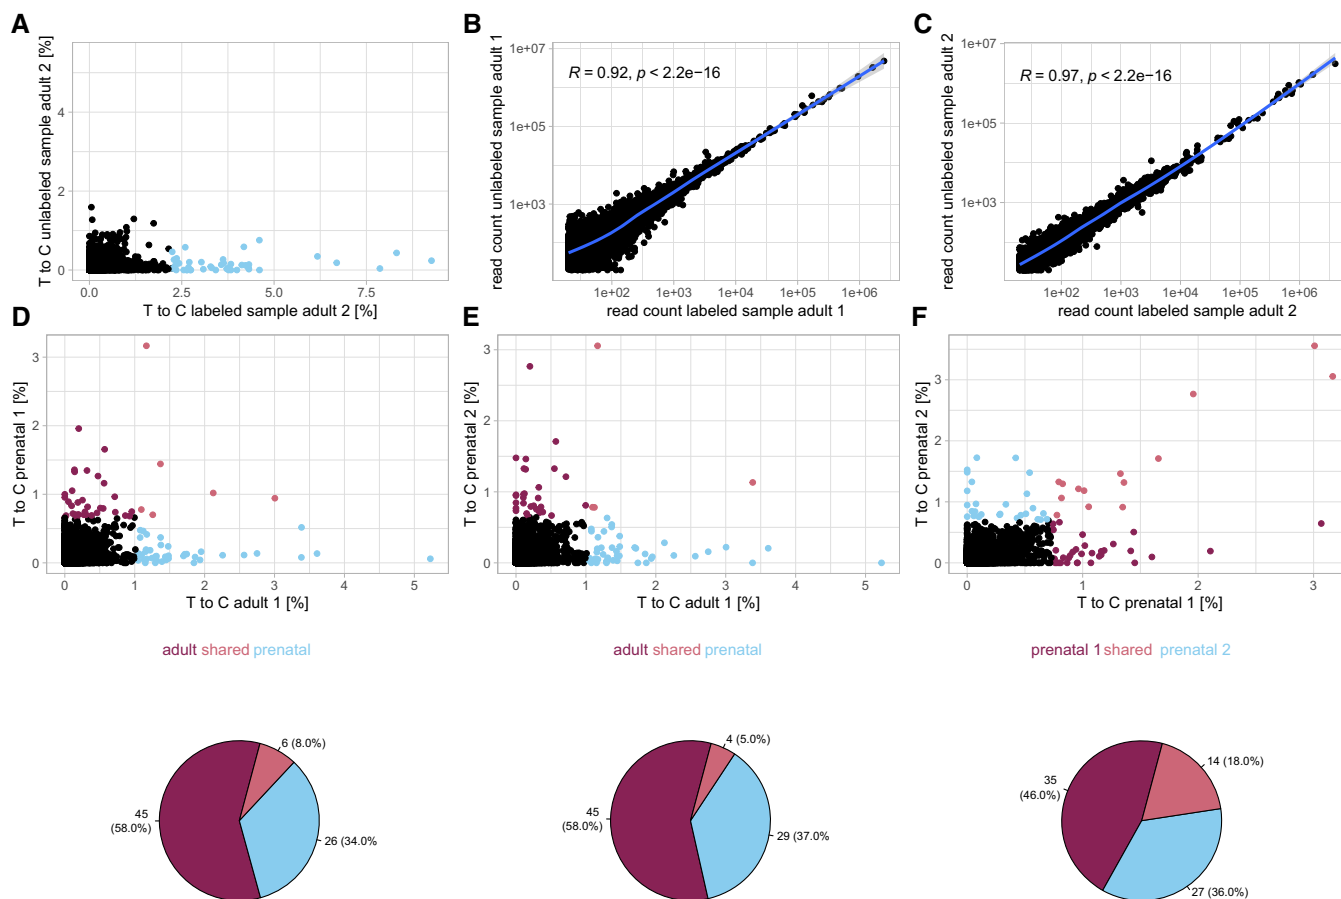

**Figure EV2. Biological replicates for cardiomyocyte dissociation experiments.**

- A Adult mouse cardiomyocytes, replicate 2, T-to-C rates per gene in labeled (4sU added) and unlabeled (no 4sU added) sample. Blue ( $\sim 1\%$  of genes): T-to-C rate  $\geq 5$  standard deviations.
- B, C Read count correlation between labeled and unlabeled adult mouse cardiomyocyte samples. Blue lines show sliding window average (smoothed conditional mean) and 95% confidence interval.  $R$  values calculated through Pearson correlation.
- D, E T-to-C rates per gene in prenatal vs. adult cardiomyocytes. Genes with T-to-C rate  $\geq 5$  standard deviations in one or both samples are highlighted.
- F T-to-C rates per gene in prenatal replicate 1 vs. prenatal replicate 2. Genes with T-to-C rate  $\geq 5$  standard deviations in one or both samples are highlighted.

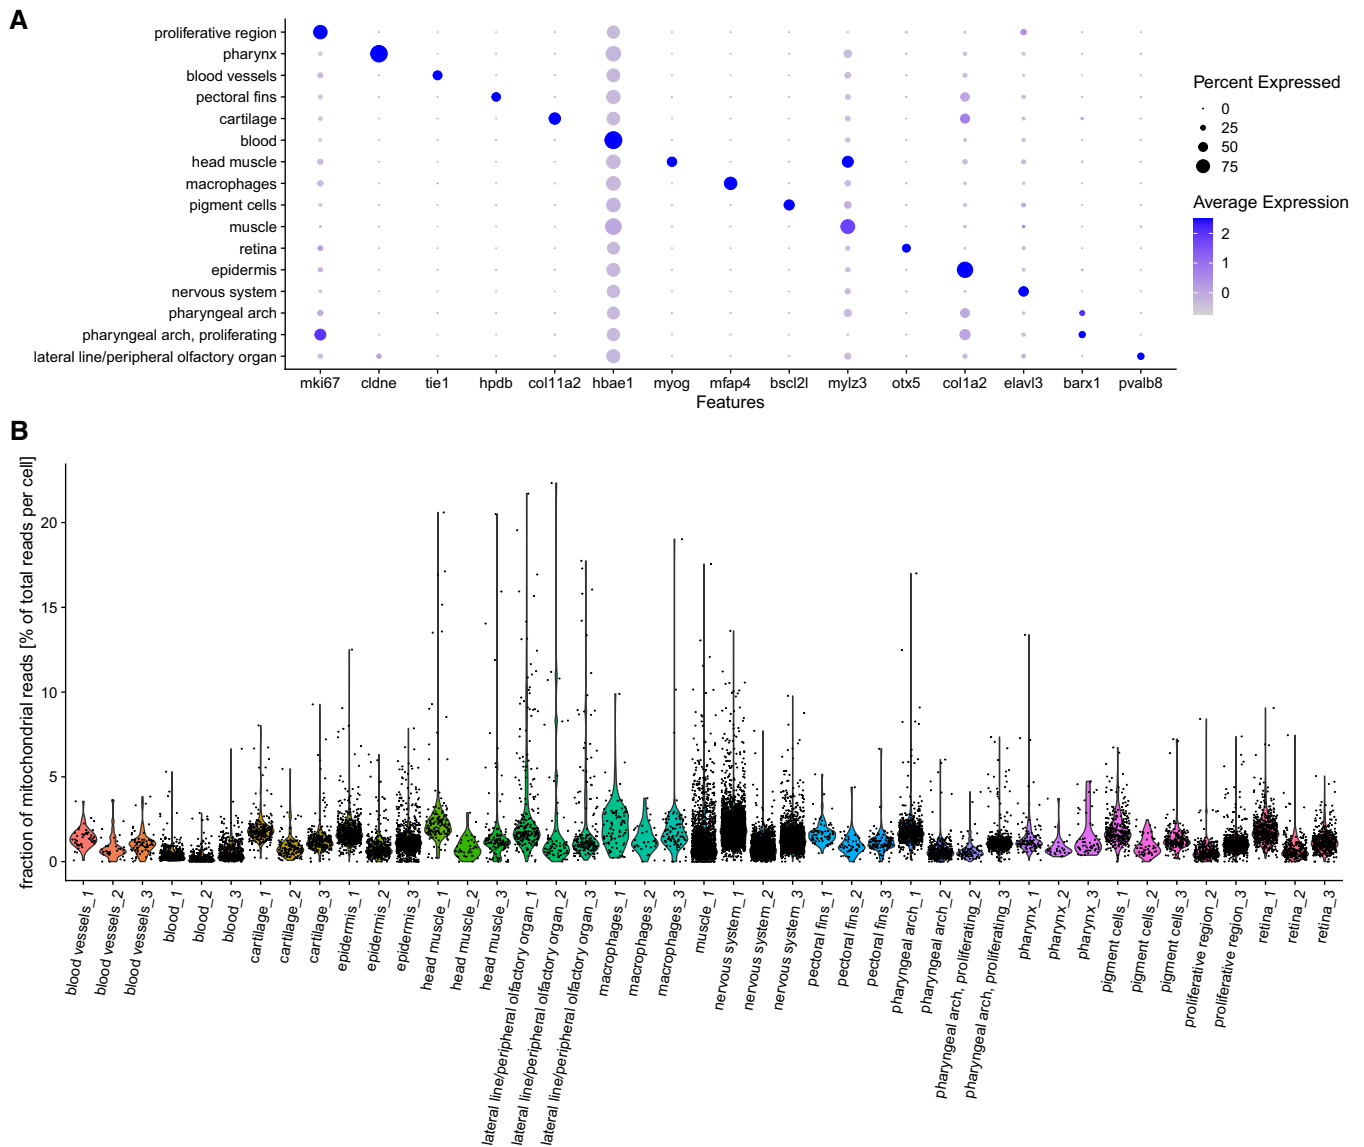

**Figure EV3. Characterization of single cell zebrafish data.**

- A Marker gene expression in 48 hpf zebrafish cells, data from all three samples is merged.
- B Fraction of mitochondrial reads per cell, cell types are separated by sample of origin.

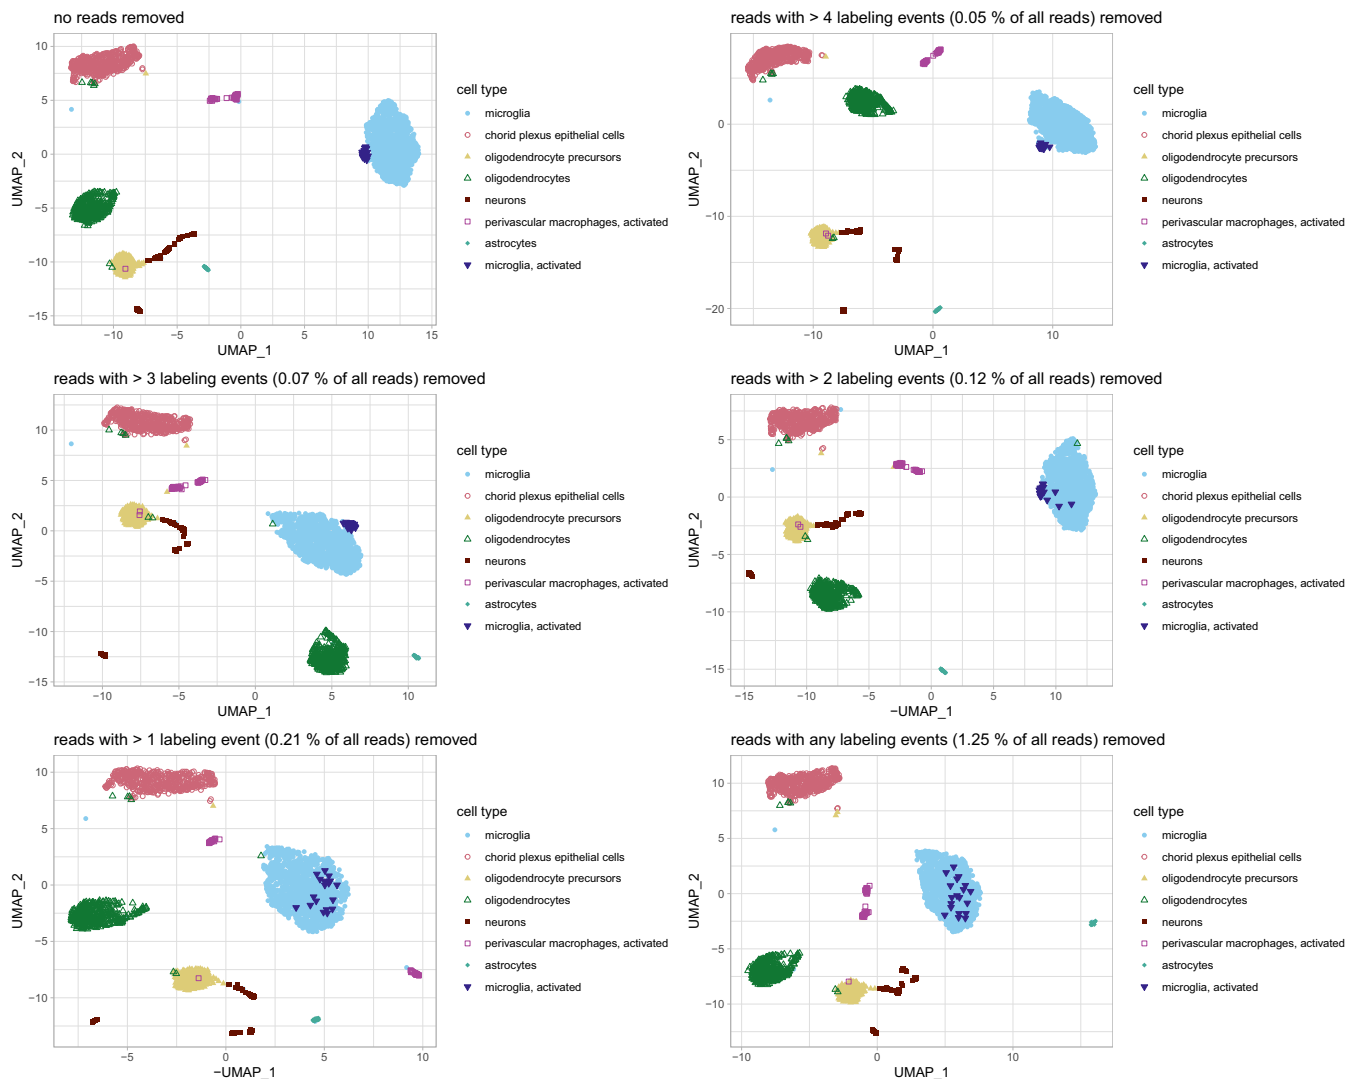

**Figure EV4. Dependence of clustering results on labeled transcripts.**

Gradual removal of labeled UMIs leads to the activated microglia cluster merging with the non-activated microglia.
